# Supplementary material for: Effects of Varying the Color, Aroma, Bitter, and Sweet Levels of a Grapefruit-Like Model Beverage on the Sensory Properties and Liking of the Consumer
Source: PubMed Central journal article supplement (PMC6413041; doi:10.3390/nu11020464), 2019-02-22
Supplement: nutrients-11-00464-s001.pdf [file nutrients-11-00464-s001.pdf]

**Table S1.** Physico-chemical characterization (means  $\pm$ standard deviation) of the 36 grapefruit-like beverages.

| No | Sample code <sup>2</sup> | Brix          | TA %          | Brix/TA Ratio | Sucrose g/100 g | Fructose g/100 g | Glucose g/100 g | L                 | a                  | b                |
|----|--------------------------|---------------|---------------|---------------|-----------------|------------------|-----------------|-------------------|--------------------|------------------|
| 1  | LMHR                     | 10.80b (0.01) | 1.26cd (0.01) | 8.75b (0.05)  | 1.54cd (0.03)   | 4.20b (0.11)     | 2.75a (0.13)    | 25.20ijkl (0.02)  | 2.28bc (0.01)      | -0.26 l (0.03)   |
| 2  | MMHR                     | 10.79b (0.02) | 1.26cd (0.01) | 8.77b (0.07)  | 1.52cd (0.00)   | 4.44ab (0.06)    | 2.82a (0.01)    | 24.87lmn (0.05)   | 2.17def (0.06)     | -0.23ijkl (0.02) |
| 3  | HMHR                     | 10.81b (0.02) | 1.27bc (0.01) | 8.74b (0.04)  | 1.46d (0.02)    | 4.43ab (0.08)    | 2.87a (0.01)    | 24.63n (0.07)     | 1.84jk (0.01)      | -0.43o (0.01)    |
| 4  | LHHR                     | 12.74a (0.01) | 1.23e (0.01)  | 10.58a (0.05) | 3.52b (0.07)    | 4.31ab (0.01)    | 2.72a (0.04)    | 25.16ijklm (0.03) | 2.43a (0.06)       | -0.09fg (0.00)   |
| 5  | MHHR                     | 12.80a (0.04) | 1.23e (0.07)  | 10.91a (0.64) | 3.67ab (0.25)   | 4.36ab (0.28)    | 2.83a (0.13)    | 25.13jklm (0.03)  | 2.19cde (0.04)     | -0.26l (0.02)    |
| 6  | HHHR                     | 12.80a (0.03) | 1.23e (0.01)  | 10.57a (0.06) | 3.62ab (0.03)   | 4.33ab (0.14)    | 2.79a (0.02)    | 24.81mn (0.20)    | 2.02gh (0.04)      | -0.36mno (0.03)  |
| 7  | LLHR                     | 8.83c (0.01)  | 1.29a (0.01)  | 7.03c (0.04)  | 0.00e (0.00)    | 4.46ab (0.15)    | 2.84a (0.01)    | 24.95klmn (0.95)  | 2.59a (0.27)       | -0.17hij (0.04)  |
| 8  | MLHR                     | 8.83c (0.00)  | 1.29a (0.01)  | 7.03c (0.03)  | 0.00e (0.00)    | 4.42ab (0.12)    | 2.79a (0.09)    | 25.15ijklm (0.31) | 2.17def (0.03)     | -0.24jkl (0.03)  |
| 9  | HLHR                     | 8.78c (0.05)  | 1.29a (0.01)  | 7.01c (0.09)  | 0.00e (0.00)    | 4.45ab (0.11)    | 2.82a (0.01)    | 25.35ghij (0.06)  | 1.97hi (0.03)      | -0.38no (0.02)   |
| 10 | LMLR                     | 10.78b (0.06) | 1.26cd (0.00) | 8.76b (0.05)  | 1.63cd (0.06)   | 4.35ab (0.07)    | 2.78a (0.03)    | 25.15ijklm (0.30) | 2.25bcd (0.07)     | -0.14gh (0.07)   |
| 11 | MMLR                     | 10.76b (0.04) | 1.25cd (0.08) | 8.78b (0.81)  | 1.63cd (0.01)   | 4.41ab (0.04)    | 2.79a (0.04)    | 25.34ghij (0.02)  | 2.16def (0.02)     | -0.25kl (0.01)   |
| 12 | HMLR                     | 10.77b (0.03) | 1.26cd (0.00) | 8.75b (0.03)  | 1.63cd (0.03)   | 4.35ab (0.07)    | 2.80a (0.12)    | 25.15ijklm (0.01) | 1.81k (0.04)       | -0.43no (0.02)   |
| 13 | LHLR                     | 12.73a (0.01) | 1.23e (0.00)  | 10.54a (0.01) | 3.71ab (0.01)   | 4.31ab (0.01)    | 2.79a (0.06)    | 25.51ghi (0.02)   | 2.31b (0.01)       | -0.15ghi (0.01)  |
| 14 | MHLR                     | 12.92a (0.24) | 1.23e (0.00)  | 10.54a (0.20) | 3.74ab (0.49)   | 4.35ab (0.50)    | 2.81a (0.33)    | 25.42ghij (0.01)  | 2.12efg (0.05)     | -0.27l (0.02)    |
| 15 | HHLR                     | 12.71a (0.03) | 1.23e (0.00)  | 10.53a (0.02) | 3.71ab (0.01)   | 4.27ab (0.02)    | 2.80a (0.03)    | 25.32ghij (0.05)  | 1.91ijk (0.02)     | -0.39no (0.01)   |
| 16 | LLLr                     | 8.79c (0.03)  | 1.29a (0.01)  | 7.03c (0.04)  | 0.00e (0.00)    | 4.50ab (0.17)    | 2.83a (0.06)    | 25.57gh (0.04)    | 2.08fg (0.04)      | -0.28lm (0.02)   |
| 17 | MLLR                     | 8.83c (0.02)  | 1.29a (0.01)  | 7.06c (0.04)  | 0.00e (0.00)    | 4.44ab (0.12)    | 2.81a (0.07)    | 25.23hijkl (0.07) | 1.92ij (0.04)      | -0.37no (0.02)   |
| 18 | HLLR                     | 8.78c (0.01)  | 1.29a (0.01)  | 7.03c (0.04)  | 0.00e (0.00)    | 4.35ab (0.02)    | 2.76a (0.04)    | 25.29hijk (0.02)  | 1.95hi (0.03)      | -0.35mn (0.03)   |
| 19 | LMHY                     | 10.79b (0.00) | 1.26cd (0.00) | 8.77b (0.00)  | 1.63cd (0.05)   | 4.40ab (0.21)    | 2.76a (0.08)    | 26.60abc (0.06)   | -0.20pqrs (0.03)   | 0.41ab (0.02)    |
| 20 | MMHY                     | 10.77b (0.01) | 1.26cd (0.00) | 8.75b (0.01)  | 1.64cd (0.31)   | 4.28ab (0.60)    | 2.76a (0.36)    | 26.59abc (0.01)   | -0.23rs (0.02)     | 0.39abc (0.01)   |
| 21 | HMHY                     | 10.72b (0.05) | 1.25cd (0.01) | 8.76b (0.07)  | 1.64cd (0.00)   | 4.43ab (0.03)    | 2.81a (0.05)    | 26.19de (0.06)    | -0.08m (0.01)      | 0.16e (0.01)     |
| 22 | LHHY                     | 12.77a (0.02) | 1.23e (0.00)  | 10.58a (0.02) | 3.67ab (0.11)   | 4.37ab (0.05)    | 2.75a (0.05)    | 26.63abc (0.06)   | -0.25rs (0.01)     | 0.46a (0.02)     |
| 23 | MHHY                     | 12.76a (0.03) | 1.23e (0.00)  | 10.57a (0.03) | 3.79a (0.09)    | 4.36ab (0.07)    | 2.78a (0.01)    | 26.26cde (0.06)   | -0.10mno (0.02)    | 0.20e (0.02)     |
| 24 | HHHY                     | 12.75a (0.06) | 1.23e (0.00)  | 10.56a (0.05) | 3.70ab (0.06)   | 4.30ab (0.07)    | 2.77a (0.02)    | 26.29bcde (0.06)  | -0.10mnop (0.01)   | 0.20e (0.02)     |
| 25 | LLHY                     | 8.81c (0.02)  | 1.29a (0.01)  | 7.05c (0.04)  | 0.00e (0.00)    | 4.44ab (0.10)    | 2.82a (0.02)    | 26.59abc (0.04)   | -0.22rs (0.04)     | 0.38abc (0.03)   |
| 26 | MLHY                     | 8.82c (0.01)  | 1.29a (0.00)  | 7.04c (0.01)  | 0.00e (0.00)    | 4.33ab (0.15)    | 2.75a (0.06)    | 26.38abcd (0.05)  | -0.16mnopqr (0.02) | 0.29d (0.02)     |
| 27 | HLHY                     | 8.73c (0.10)  | 1.28ab (0.00) | 7.02c (0.08)  | 0.00e (0.00)    | 4.52ab (0.03)    | 2.84a (0.04)    | 25.99ef (0.02)    | 0.02l (0.04)       | -0.04f (0.01)    |
| 28 | LMLY                     | 10.81b (0.01) | 1.26cd (0.00) | 8.79b (0.00)  | 1.71c (0.08)    | 4.54a (0.04)     | 2.86a (0.05)    | 26.69a (0.08)     | -0.23rs (0.03)     | 0.43a (0.04)     |
| 29 | MMLY                     | 10.78b (0.02) | 1.25d (0.00)  | 8.83b (0.01)  | 1.62cd (0.06)   | 4.49ab (0.02)    | 2.88a (0.08)    | 26.42abcd (0.08)  | -0.19nopqrs (0.02) | 0.30d (0.00)     |
| 30 | HMLY                     | 10.77b (0.01) | 1.25d (0.00)  | 8.82b (0.01)  | 1.60cd (0.02)   | 4.39ab (0.07)    | 2.81a (0.02)    | 25.67fg (0.01)    | 0.09l (0.02)       | -0.17hijk (0.01) |
| 31 | LHLY                     | 12.75a (0.03) | 1.23e (0.01)  | 10.60a (0.03) | 3.61ab (0.07)   | 4.30ab (0.09)    | 2.76a (0.02)    | 26.62abc (0.01)   | -0.26s (0.03)      | 0.43a (0.01)     |
| 32 | MHLY                     | 12.72a (0.08) | 1.23e (0.01)  | 10.57a (0.10) | 3.73ab (0.17)   | 4.35ab (0.14)    | 2.83a (0.08)    | 26.45abcd (0.10)  | -0.15mnopqr (0.02) | 0.33bcd (0.04)   |
| 33 | HHLY                     | 12.81a (0.02) | 1.23e (0.01)  | 10.58a (0.04) | 3.67ab (0.01)   | 4.41ab (0.03)    | 2.79a (0.02)    | 26.29bcde (0.04)  | -0.09mn (0.02)     | 0.20e (0.01)     |
| 34 | LLLY                     | 8.80c (0.01)  | 1.29a (0.00)  | 7.02c (0.01)  | 0.00e (0.00)    | 4.37ab (0.07)    | 2.77a (0.03)    | 26.63ab (0.04)    | -0.21qrs (0.01)    | 0.38abc (0.03)   |
| 35 | MLLY                     | 8.80c (0.03)  | 1.28a (0.01)  | 7.06c (0.05)  | 0.00e (0.00)    | 4.26ab (0.02)    | 2.75a (0.00)    | 26.29bcde (0.05)  | -0.12mnopq (0.02)  | 0.19e (0.01)     |
| 36 | HLLY                     | 8.71c (0.01)  | 1.28ab (0.00) | 7.01c (0.01)  | 0.00e (0.00)    | 4.29ab (0.12)    | 2.70a (0.01)    | 26.52abcd (0.07)  | -0.19opqrs (0.02)  | 0.32cd (0.03)    |

<sup>2</sup> Refer to Table 1, Mean values in a column with different letters are significantly different ( $p < 0.05$ ).

**Table S2.** Summary of sensory attribute mean values [ $\pm$  standard error of means (SEM)] and significance of bitter x aroma and bitter x color two-way ANOVA interactions of the model grapefruit-like beverages as evaluated by a trained sensory panel ( $n = 16$ ).

| Attributes                | Bitter (Naringin mg/kg) x Aroma (mg/kg) <sup>2</sup> |                                |                               |                               |                               |                               | Bitter (Naringin mg/kg) x Color <sup>3</sup> |                 |                 |                 |                 |                 |                 |    |
|---------------------------|------------------------------------------------------|--------------------------------|-------------------------------|-------------------------------|-------------------------------|-------------------------------|----------------------------------------------|-----------------|-----------------|-----------------|-----------------|-----------------|-----------------|----|
|                           | Bitter (Naringin mg/kg)                              |                                |                               |                               |                               |                               | Bitter (Naringin mg/kg)                      |                 |                 |                 |                 |                 |                 |    |
|                           | 158 (low)                                            |                                | 315 (medium)                  |                               | 473 (high)                    |                               | 158 (low)                                    |                 | 315 (medium)    |                 | 473 (high)      |                 |                 |    |
|                           | Aroma(mg/kg)                                         |                                |                               |                               |                               |                               | Color                                        |                 |                 |                 |                 |                 |                 |    |
|                           | 2.5                                                  | 10                             | 2.5                           | 10                            | 2.5                           | 10                            |                                              |                 |                 |                 |                 |                 |                 |    |
|                           | Low                                                  | High                           | Low                           | High                          | Low                           | High                          | Red                                          | Yellow          | Red             | Yellow          | Red             | Yellow          |                 |    |
| Overall aroma intensity   | 5.40a<br>(0.08)                                      | 6.33a<br>(0.08)                | 5.71a<br>(0.08)               | 6.37a<br>(0.08)               | 5.46a<br>(0.08)               | 6.39a<br>(0.08)               | NS                                           | 5.94a<br>(0.08) | 5.79a<br>(0.08) | 6.18a<br>(0.08) | 5.89a<br>(0.08) | 6.05a<br>(0.08) | 5.81a<br>(0.08) | NS |
| Citrus aroma              | 4.19a<br>(0.08)                                      | 4.83a<br>(0.08)                | 4.33a<br>(0.08)               | 4.82a<br>(0.08)               | 4.17a<br>(0.08)               | 4.93a<br>(0.08)               | NS                                           | 4.45a<br>(0.08) | 4.57a<br>(0.08) | 4.67a<br>(0.08) | 4.49a<br>(0.08) | 4.50a<br>(0.08) | 4.60a<br>(0.08) | NS |
| Grapefruit aroma          | 4.01a<br>(0.08)                                      | 4.54a<br>(0.08)                | 4.07a<br>(0.08)               | 4.39a<br>(0.08)               | 4.10a<br>(0.08)               | 4.53a<br>(0.08)               | NS                                           | 4.43a<br>(0.08) | 4.13a<br>(0.08) | 4.36a<br>(0.08) | 4.10a<br>(0.08) | 4.40a<br>(0.08) | 4.23a<br>(0.08) | NS |
| Chemical aroma            | <b>3.65c</b><br><b>(0.10)</b>                        | <b>4.34a</b><br><b>(0.10)</b>  | <b>4.04a</b><br><b>(0.10)</b> | <b>4.22a</b><br><b>(0.10)</b> | <b>3.91b</b><br><b>(0.10)</b> | <b>4.20a</b><br><b>(0.10)</b> | *                                            | 4.04a<br>(0.10) | 3.94a<br>(0.10) | 4.18a<br>(0.10) | 4.08a<br>(0.10) | 4.04a<br>(0.10) | 4.08a<br>(0.10) | NS |
| Deteriorated/rotten aroma | 2.07a<br>(0.06)                                      | 2.09a<br>(0.06)                | 2.08a<br>(0.06)               | 1.99a<br>(0.06)               | 2.12a<br>(0.06)               | 2.06a<br>(0.06)               | NS                                           | 2.18a<br>(0.06) | 1.98a<br>(0.06) | 2.05a<br>(0.06) | 2.03a<br>(0.06) | 2.19a<br>(0.06) | 1.99a<br>(0.06) | NS |
| Muddy/mouldy aroma        | 2.02a<br>(0.05)                                      | 2.23a<br>(0.05)                | 2.12a<br>(0.05)               | 2.15a<br>(0.05)               | 2.13a<br>(0.05)               | 2.23a<br>(0.05)               | NS                                           | 2.19a<br>(0.05) | 2.06a<br>(0.05) | 2.20a<br>(0.05) | 2.07a<br>(0.05) | 2.22a<br>(0.05) | 2.13a<br>(0.05) | NS |
| Fruity aroma              | 3.70a<br>(0.08)                                      | 4.08a<br>(0.08)                | 3.69a<br>(0.08)               | 3.98a<br>(0.08)               | 3.74a<br>(0.08)               | 3.95a<br>(0.08)               | NS                                           | 3.93a<br>(0.08) | 3.85a<br>(0.08) | 3.89a<br>(0.08) | 3.78a<br>(0.08) | 3.97a<br>(0.08) | 3.72a<br>(0.08) | NS |
| Green/grassy aroma        | 2.85a<br>(0.07)                                      | 3.40a<br>(0.07)                | 2.92a<br>(0.07)               | 3.26a<br>(0.07)               | 2.96a<br>(0.07)               | 3.43a<br>(0.07)               | NS                                           | 3.15a<br>(0.07) | 3.09a<br>(0.07) | 3.10a<br>(0.07) | 3.08a<br>(0.07) | 3.15a<br>(0.07) | 3.24a<br>(0.07) | NS |
| Peely/peel oil aroma      | 3.17a<br>(0.08)                                      | 3.90a<br>(0.08)                | 3.22a<br>(0.08)               | 3.72a<br>(0.08)               | 3.22a<br>(0.08)               | 3.77a<br>(0.08)               | NS                                           | 3.56a<br>(0.08) | 3.50a<br>(0.08) | 3.49a<br>(0.08) | 3.45a<br>(0.08) | 3.54a<br>(0.08) | 3.45a<br>(0.08) | NS |
| Soapy aroma               | 3.08a<br>(0.09)                                      | 3.45a<br>(0.09)                | 3.12a<br>(0.09)               | 3.28a<br>(0.09)               | 3.28a<br>(0.09)               | 3.34a<br>(0.09)               | NS                                           | 3.25a<br>(0.09) | 3.28a<br>(0.09) | 3.30a<br>(0.09) | 3.10a<br>(0.09) | 3.31a<br>(0.09) | 3.32a<br>(0.09) | NS |
| Pungent aroma             | 2.73a<br>(0.08)                                      | 3.47a<br>(0.08)                | 2.95a<br>(0.08)               | 3.32a<br>(0.08)               | 2.85a<br>(0.08)               | 3.50a<br>(0.08)               | NS                                           | 3.12a<br>(0.08) | 3.08a<br>(0.08) | 3.19a<br>(0.08) | 3.09a<br>(0.08) | 3.18a<br>(0.08) | 3.18a<br>(0.08) | NS |
| Woody/spicy aroma         | 2.27a<br>(0.06)                                      | 2.59a<br>(0.06)                | 2.35a<br>(0.06)               | 2.53a<br>(0.06)               | 2.36a<br>(0.06)               | 2.58<br>(0.06)                | NS                                           | 2.43a<br>(0.06) | 2.43a<br>(0.06) | 2.53a<br>(0.06) | 2.35a<br>(0.06) | 2.52a<br>(0.06) | 2.42a<br>(0.06) | NS |
| Sweet aroma               | 3.53a<br>(0.09)                                      | 3.93a<br>(0.09)                | 3.56a<br>(0.09)               | 3.82a<br>(0.09)               | 3.58a<br>(0.09)               | 3.83<br>(0.09)                | NS                                           | 3.85a<br>(0.09) | 3.61a<br>(0.09) | 3.72a<br>(0.09) | 3.66a<br>(0.09) | 3.81a<br>(0.09) | 3.60a<br>(0.09) | NS |
| Overall flavour intensity | <b>6.06c</b><br><b>(0.08)</b>                        | <b>6.22bc</b><br><b>(0.08)</b> | <b>6.62a</b><br><b>(0.08)</b> | <b>6.39b</b><br><b>(0.08)</b> | <b>6.43a</b><br><b>(0.08)</b> | <b>6.48a</b><br><b>(0.08)</b> | *                                            | 6.19a<br>(0.08) | 6.09a<br>(0.08) | 6.62a<br>(0.08) | 6.40a<br>(0.08) | 6.37a<br>(0.08) | 6.54a<br>(0.08) | NS |
| Sour flavour              | 4.83a<br>(0.11)                                      | 4.98a<br>(0.11)                | 5.20a<br>(0.11)               | 4.95a<br>(0.11)               | 5.40a<br>(0.11)               | 5.41a<br>(0.11)               | NS                                           | 4.86a<br>(0.11) | 4.94a<br>(0.11) | 5.08a<br>(0.11) | 5.07a<br>(0.11) | 5.32a<br>(0.11) | 5.48a<br>(0.11) | NS |

|                    |                               |                               |                                |                               |                               |                               |    |                                |                               |                               |                               |                               |                               |    |
|--------------------|-------------------------------|-------------------------------|--------------------------------|-------------------------------|-------------------------------|-------------------------------|----|--------------------------------|-------------------------------|-------------------------------|-------------------------------|-------------------------------|-------------------------------|----|
| Sweet flavour      | 4.53a<br>(0.09)               | 4.75a<br>(0.09)               | 4.45a<br>(0.09)                | 4.58a<br>(0.09)               | 4.18a<br>(0.09)               | 4.24a<br>(0.09)               | NS | 4.65a<br>(0.09)                | 4.63a<br>(0.09)               | 4.59a<br>(0.09)               | 4.43a<br>(0.09)               | 4.19a<br>(0.09)               | 4.23a<br>(0.09)               | NS |
| Bitter flavour     | <b>4.00d</b><br><b>(0.12)</b> | <b>3.88d</b><br><b>(0.12)</b> | <b>4.87bc</b><br><b>(0.12)</b> | <b>4.05d</b><br><b>(0.12)</b> | <b>5.44a</b><br><b>(0.12)</b> | <b>4.89b</b><br><b>(0.12)</b> | *  | 4.01a<br>(0.12)                | 3.86a<br>(0.12)               | 4.58a<br>(0.12)               | 4.34a<br>(0.12)               | 5.08a<br>(0.12)               | 5.25a<br>(0.12)               | NS |
| Astringent flavour | 4.60a<br>(0.10)               | 4.63a<br>(0.10)               | 5.04a<br>(0.10)                | 4.76a<br>(0.10)               | 5.25a<br>(0.10)               | 4.98a<br>(0.10)               | NS | 4.71a<br>(0.10)                | 4.52a<br>(0.10)               | 5.01a<br>(0.10)               | 4.80a<br>(0.10)               | 5.12a<br>(0.10)               | 5.11a<br>(0.10)               | NS |
| Citrus flavour     | 4.42a<br>(0.08)               | 4.62a<br>(0.08)               | 4.29a<br>(0.08)                | 4.59a<br>(0.08)               | 4.20a<br>(0.08)               | 4.57a<br>(0.08)               | NS | 4.54a<br>(0.08)                | 4.50a<br>(0.08)               | 4.41a<br>(0.08)               | 4.48a<br>(0.08)               | 4.45a<br>(0.08)               | 4.32a<br>(0.08)               | NS |
| Grapefruit flavour | 4.17a<br>(0.09)               | 4.21a<br>(0.09)               | 4.57a<br>(0.09)                | 4.25a<br>(0.09)               | 4.73a<br>(0.09)               | 4.73a<br>(0.09)               | NS | 4.37a<br>(0.09)                | 4.01a<br>(0.09)               | 4.49a<br>(0.09)               | 4.33a<br>(0.09)               | 4.73a<br>(0.09)               | 4.72a<br>(0.09)               | NS |
| Bitter aftertaste  | <b>3.70c</b><br><b>(0.12)</b> | <b>3.68c</b><br><b>(0.12)</b> | <b>4.54b</b><br><b>(0.12)</b>  | <b>3.97c</b><br><b>(0.12)</b> | <b>5.23a</b><br><b>(0.12)</b> | <b>4.60b</b><br><b>(0.12)</b> | *  | <b>3.79bc</b><br><b>(0.12)</b> | <b>3.59c</b><br><b>(0.12)</b> | <b>4.40b</b><br><b>(0.12)</b> | <b>4.11b</b><br><b>(0.12)</b> | <b>4.77a</b><br><b>(0.12)</b> | <b>5.06a</b><br><b>(0.12)</b> | *  |

<sup>1</sup> Mean values in a row for a specific two-way interaction effect printed in bold and with different letters are significantly different; \*  $p \leq 0.05$ , \*\*  $p \leq 0.01$ , \*\*\*  $p \leq 0.0001$ ; NS = not significantly different Attribute intensity scale (0–10 cm) ranging from ‘not intense’ (0) to ‘very intense’ (10); <sup>2</sup> Aroma blend [Caryophyllene, citral, nootkatone, aldehyde C8 (octanal), aldehyde C9 (nonanal), aldehyde C10 (decanal)] <sup>3</sup> Red color = 0.001% solution (30 % Sunset yellow and 70 % Ponceau red); Yellow color = 0.0125 % Quinoline yellow.

**Table S3.** Summary of sensory attribute mean values [ $\pm$  standard error of means (SEM)] and significance of bitter x sweet and aroma x color two-way ANOVA interactions of the model grapefruit-like beverages as evaluated by a trained sensory panel ( $n = 16$ ).

| Attributes                | Bitter (Naringin mg/kg) x Sweet (°Brix) |                 |                 |                 |                 |                 |                 |                 |                 | Aroma mg/kg <sup>2</sup> x Color <sup>3</sup> |                 |                 |                 |                 |    |
|---------------------------|-----------------------------------------|-----------------|-----------------|-----------------|-----------------|-----------------|-----------------|-----------------|-----------------|-----------------------------------------------|-----------------|-----------------|-----------------|-----------------|----|
|                           | Bitter (Naringin mg/kg)                 |                 |                 |                 |                 |                 |                 |                 |                 | Aroma mg/kg                                   |                 |                 |                 |                 |    |
|                           | 158 (low)                               |                 |                 | 315 (medium)    |                 |                 | 473 (high)      |                 |                 | 2.5 (low)                                     |                 | 10 (high)       |                 |                 |    |
|                           | Sweet (Brix)                            |                 |                 |                 |                 |                 | Color           |                 |                 |                                               |                 |                 |                 |                 |    |
|                           | 8 Low                                   | 10 Medium       | 12 High         | 8 Low           | 10 Medium       | 12 High         | 8 Low           | 10 Medium       | 12 High         |                                               | Red             | Yellow          | Red             | Yellow          |    |
| Overall aroma intensity   | 5.90a <sup>2</sup><br>(0.10)            | 5.90a<br>(0.10) | 5.80a<br>(0.10) | 6.20a<br>(0.10) | 5.89a<br>(0.10) | 6.03a<br>(0.10) | 5.80a<br>(0.10) | 5.94a<br>(0.10) | 6.05a<br>(0.10) | NS                                            | 5.59a<br>(0.06) | 5.45a<br>(0.06) | 6.52a<br>(0.06) | 6.21a<br>(0.06) | NS |
| Citrus aroma              | 4.31a<br>(0.10)                         | 4.68a<br>(0.10) | 4.54a<br>(0.10) | 4.64a<br>(0.10) | 4.49a<br>(0.10) | 4.60a<br>(0.10) | 4.58a<br>(0.10) | 4.56a<br>(0.10) | 4.51a<br>(0.10) | NS                                            | 4.22a<br>(0.07) | 4.24a<br>(0.07) | 4.86a<br>(0.07) | 4.86a<br>(0.07) | NS |
| Grapefruit aroma          | 4.19a<br>(0.10)                         | 4.39a<br>(0.10) | 4.25a<br>(0.10) | 4.20a<br>(0.10) | 4.27a<br>(0.10) | 4.22a<br>(0.10) | 4.29a<br>(0.10) | 4.38a<br>(0.10) | 4.38a<br>(0.10) | NS                                            | 4.12a<br>(0.06) | 4.00a<br>(0.06) | 4.67a<br>(0.06) | 4.30a<br>(0.06) | NS |
| Chemical aroma            | 3.91a<br>(0.12)                         | 4.02a<br>(0.12) | 4.04a<br>(0.12) | 4.33a<br>(0.12) | 3.98a<br>(0.12) | 4.08a<br>(0.12) | 3.94a<br>(0.12) | 4.08a<br>(0.12) | 4.16a<br>(0.12) | NS                                            | 3.91a<br>(0.08) | 3.82a<br>(0.08) | 4.26a<br>(0.08) | 4.25a<br>(0.08) | NS |
| Deteriorated/rotten aroma | 2.03a<br>(0.08)                         | 2.02a<br>(0.08) | 2.19a<br>(0.08) | 2.06a<br>(0.08) | 2.05a<br>(0.08) | 2.01a<br>(0.08) | 2.06a<br>(0.08) | 2.04a<br>(0.08) | 2.15a<br>(0.08) | NS                                            | 2.18a<br>(0.05) | 2.01a<br>(0.05) | 2.10a<br>(0.05) | 1.99a<br>(0.05) | NS |
| Muddy/mouldy aroma        | 2.12a<br>(0.06)                         | 2.13a<br>(0.06) | 2.12a<br>(0.06) | 2.23a<br>(0.06) | 2.11a<br>(0.06) | 2.06a<br>(0.06) | 2.17a<br>(0.06) | 2.16a<br>(0.06) | 2.20a<br>(0.06) | NS                                            | 2.15a<br>(0.04) | 2.02a<br>(0.04) | 2.26a<br>(0.04) | 2.15a<br>(0.04) | NS |
| Fruity aroma              | 3.89a<br>(0.10)                         | 4.02a<br>(0.10) | 3.75a<br>(0.10) | 3.78a<br>(0.10) | 3.87a<br>(0.10) | 3.85a<br>(0.10) | 3.82a<br>(0.10) | 3.82a<br>(0.10) | 3.90a<br>(0.10) | NS                                            | 3.79a<br>(0.07) | 3.63a<br>(0.07) | 4.07a<br>(0.07) | 3.94a<br>(0.07) | NS |

|                           |                         |                        |                        |                        |                        |                         |                        |                        |                        |    |                        |                        |                        |                        |    |
|---------------------------|-------------------------|------------------------|------------------------|------------------------|------------------------|-------------------------|------------------------|------------------------|------------------------|----|------------------------|------------------------|------------------------|------------------------|----|
| Green/grassy aroma        | 3.10a<br>(0.08)         | 3.22a<br>(0.08)        | 3.05a<br>(0.08)        | 3.15a<br>(0.08)        | 3.09a<br>(0.08)        | 3.02a<br>(0.08)         | 3.11a<br>(0.08)        | 3.24a<br>(0.08)        | 3.24a<br>(0.08)        | NS | 2.92a<br>(0.06)        | 2.90a<br>(0.06)        | 3.35a<br>(0.06)        | 3.37a<br>(0.06)        | NS |
| Peely/peel oil aroma      | 3.58a<br>(0.10)         | 3.57a<br>(0.10)        | 3.45a<br>(0.10)        | 3.50a<br>(0.10)        | 3.52a<br>(0.10)        | 3.39a<br>(0.10)         | 3.39a<br>(0.10)        | 3.66a<br>(0.10)        | 3.54a<br>(0.10)        | NS | 3.25a<br>(0.06)        | 3.16a<br>(0.06)        | 3.81a<br>(0.06)        | 3.78a<br>(0.06)        | NS |
| Soapy aroma               | 3.29a<br>(0.11)         | 3.46a<br>(0.11)        | 3.05a<br>(0.11)        | 3.39a<br>(0.11)        | 3.23a<br>(0.11)        | 2.99a<br>(0.11)         | 3.54a<br>(0.11)        | 3.31a<br>(0.11)        | 3.09a<br>(0.11)        | NS | 3.18a<br>(0.07)        | 3.14a<br>(0.07)        | 3.39a<br>(0.07)        | 3.32a<br>(0.07)        | NS |
| Pungent aroma             | <b>2.96ab</b><br>(0.10) | <b>3.20a</b><br>(0.10) | <b>3.13a</b><br>(0.10) | <b>3.40a</b><br>(0.10) | <b>2.96b</b><br>(0.10) | <b>3.05ab</b><br>(0.10) | <b>3.15a</b><br>(0.10) | <b>3.23a</b><br>(0.10) | <b>3.14a</b><br>(0.10) | *  | 2.87a<br>(0.07)        | 2.81a<br>(0.07)        | 3.45a<br>(0.07)        | 3.41a<br>(0.07)        | NS |
| Woody/spicy aroma         | 2.44a<br>(0.07)         | 2.51a<br>(0.07)        | 2.34a<br>(0.07)        | 2.51a<br>(0.07)        | 2.43a<br>(0.07)        | 2.38a<br>(0.07)         | 2.49a<br>(0.07)        | 2.52a<br>(0.07)        | 2.40a<br>(0.07)        | NS | 2.39a<br>(0.05)        | 2.26a<br>(0.05)        | 2.60a<br>(0.05)        | 2.54a<br>(0.05)        | NS |
| Sweet aroma               | 3.77a<br>(0.10)         | 3.78a<br>(0.10)        | 3.64a<br>(0.10)        | 3.72a<br>(0.10)        | 3.70a<br>(0.10)        | 3.66a<br>(0.10)         | 3.57a<br>(0.10)        | 3.68a<br>(0.10)        | 3.86a<br>(0.10)        | NS | 3.65a<br>(0.07)        | 3.46a<br>(0.07)        | 3.93a<br>(0.07)        | 3.79a<br>(0.07)        | NS |
| Overall flavour intensity | 6.02a<br>(0.10)         | 6.15a<br>(0.10)        | 6.24a<br>(0.10)        | 6.57a<br>(0.10)        | 6.37a<br>(0.10)        | 6.58a<br>(0.10)         | 6.63a<br>(0.10)        | 6.35a<br>(0.10)        | 6.35a<br>(0.10)        | NS | 6.38a<br>(0.07)        | 6.36a<br>(0.07)        | 6.41a<br>(0.07)        | 6.32a<br>(0.07)        | NS |
| Sour flavour              | 5.77a<br>(0.14)         | 4.71a<br>(0.14)        | 4.23a<br>(0.14)        | 5.94a<br>(0.14)        | 5.14a<br>(0.14)        | 4.15a<br>(0.14)         | 6.09a<br>(0.14)        | 5.37a<br>(0.14)        | 4.76a<br>(0.14)        | NS | 5.20a<br>(0.09)        | 5.10a<br>(0.09)        | 4.99a<br>(0.09)        | 5.24a<br>(0.09)        | NS |
| Sweet flavour             | 3.15a<br>(0.11)         | 4.78a<br>(0.11)        | 5.99a<br>(0.11)        | 3.02a<br>(0.11)        | 4.57a<br>(0.11)        | 5.95a<br>(0.11)         | 2.95a<br>(0.11)        | 4.16a<br>(0.11)        | 5.51a<br>(0.11)        | NS | 4.34a<br>(0.07)        | 4.43a<br>(0.07)        | 4.61a<br>(0.07)        | 4.44a<br>(0.07)        | NS |
| Bitter flavour            | 4.64a<br>(0.15)         | 3.91a<br>(0.15)        | 3.27a<br>(0.15)        | 5.28a<br>(0.15)        | 4.20a<br>(0.15)        | 3.89a<br>(0.15)         | 5.81a<br>(0.15)        | 5.19a<br>(0.15)        | 4.50a<br>(0.15)        | NS | <b>4.91a</b><br>(0.10) | <b>4.64a</b><br>(0.11) | <b>4.21c</b><br>(0.11) | <b>4.33b</b><br>(0.11) | *  |
| Astringent flavour        | 5.10a<br>(0.13)         | 4.71a<br>(0.13)        | 4.05a<br>(0.13)        | 5.42a<br>(0.13)        | 4.85a<br>(0.13)        | 4.45a<br>(0.13)         | 5.53a<br>(0.13)        | 5.07a<br>(0.13)        | 4.75a<br>(0.13)        | NS | 5.04a<br>(0.08)        | 4.89a<br>(0.08)        | 4.85a<br>(0.08)        | 4.73a<br>(0.08)        | NS |
| Citrus flavour            | 4.61a<br>(0.10)         | 4.45a<br>(0.10)        | 4.50a<br>(0.10)        | 4.29a<br>(0.10)        | 4.56a<br>(0.10)        | 4.47a<br>(0.10)         | 4.38a<br>(0.10)        | 4.33a<br>(0.10)        | 4.46a<br>(0.10)        | NS | 4.34a<br>(0.07)        | 4.27a<br>(0.07)        | 4.59a<br>(0.07)        | 4.60a<br>(0.07)        | NS |
| Grapefruit flavour        | 4.24a<br>(0.12)         | 4.28a<br>(0.12)        | 4.04a<br>(0.12)        | 4.46a<br>(0.12)        | 4.51a<br>(0.12)        | 4.26a<br>(0.12)         | 4.87a<br>(0.12)        | 4.83a<br>(0.12)        | 4.48a<br>(0.12)        | NS | 4.55a<br>(0.08)        | 4.42a<br>(0.08)        | 4.50a<br>(0.08)        | 4.29a<br>(0.08)        | NS |
| Bitter aftertaste         | 4.21a<br>(0.15)         | 3.67a<br>(0.15)        | 3.19a<br>(0.15)        | 5.10a<br>(0.15)        | 4.14a<br>(0.15)        | 3.54a<br>(0.15)         | 5.40a<br>(0.15)        | 4.93a<br>(0.15)        | 4.41a<br>(0.15)        | NS | 4.59a<br>(0.10)        | 4.40a<br>(0.10)        | 4.05a<br>(0.10)        | 4.12a<br>(0.10)        | NS |

<sup>1</sup> Mean values in a row for a specific two-way interaction effect printed in bold and with different letters are significantly different, \*  $p \leq 0.05$ , \*\*  $p \leq 0.01$ , \*\*\*  $p \leq 0.0001$ ; NS = not significantly different. Attribute intensity scale (0–10 cm) ranging from ‘not intense’ (0) to ‘very intense’ (10); <sup>2</sup>Aroma blend [Caryophyllene, citral, nootkatone, aldehyde C8 (octanal), aldehyde C9 (nonanal), aldehyde C10 (decanal)] <sup>3</sup>Red color = 0.001 % solution (30 % Sunset yellow and 70 % Ponceau red); Yellow color = 0.0125% Quinoline yellow.

**Table S4.** Summary of sensory attribute mean values [ $\pm$  standard error of means (SEM)] and significance of sweet x aroma and sweet x color two-way ANOVA interactions of the model grapefruit-like beverages as evaluated by a trained sensory panel ( $n = 16$ ).

| Attributes                | Sweet (°Brix) x Aroma mg/kg <sup>2</sup> |                 |                 |                 |                 |                 | Sweet (°Brix) x Color <sup>3</sup> |                 |                 |                 |                 |                 |                 |    |
|---------------------------|------------------------------------------|-----------------|-----------------|-----------------|-----------------|-----------------|------------------------------------|-----------------|-----------------|-----------------|-----------------|-----------------|-----------------|----|
|                           | Sweet (Brix)                             |                 |                 |                 |                 |                 | Sweet (°Brix)                      |                 |                 |                 |                 |                 |                 |    |
|                           | 8 Low                                    |                 | 10 Medium       |                 | 12 High         |                 | 8 Low                              |                 | 10 Medium       |                 | 12 High         |                 |                 |    |
|                           | Aroma mg/kg                              |                 |                 |                 |                 |                 | Color                              |                 |                 |                 |                 |                 |                 |    |
|                           | 2.5<br>Low                               | 10<br>High      | 2.5<br>Low      | 10<br>High      | 2.5<br>Low      | 10<br>High      |                                    | Red             | Yellow          | Red             | Yellow          | Red             | Yellow          |    |
| Overall aroma intensity   | 5.57a <sup>2</sup><br>(0.08)             | 6.36a<br>(0.08) | 5.44a<br>(0.08) | 6.38a<br>(0.08) | 5.57a<br>(0.08) | 6.35a<br>(0.08) | NS                                 | 6.11a<br>(0.08) | 5.82a<br>(0.08) | 5.94a<br>(0.08) | 5.88a<br>(0.08) | 6.13a<br>(0.08) | 5.79a<br>(0.08) | NS |
| Citrus aroma              | 4.17a<br>(0.08)                          | 4.84a<br>(0.08) | 4.27a<br>(0.08) | 4.88a<br>(0.08) | 4.24a<br>(0.08) | 4.85a<br>(0.08) | NS                                 | 4.60a<br>(0.08) | 4.42a<br>(0.08) | 4.52a<br>(0.08) | 4.64a<br>(0.08) | 4.50a<br>(0.08) | 4.60a<br>(0.08) | NS |
| Grapefruit aroma          | 4.01a<br>(0.08)                          | 4.44a<br>(0.08) | 4.16a<br>(0.08) | 4.53a<br>(0.08) | 4.00a<br>(0.08) | 4.50a<br>(0.08) | NS                                 | 4.43a<br>(0.08) | 4.03a<br>(0.08) | 4.46a<br>(0.08) | 4.23a<br>(0.08) | 4.30a<br>(0.08) | 4.20a<br>(0.08) | NS |
| Chemical aroma            | 3.93a<br>(0.10)                          | 4.20a<br>(0.10) | 3.79a<br>(0.10) | 4.26a<br>(0.10) | 3.88a<br>(0.10) | 4.30a<br>(0.10) | NS                                 | 4.15a<br>(0.10) | 3.98a<br>(0.10) | 3.99a<br>(0.10) | 4.06a<br>(0.10) | 4.12a<br>(0.10) | 4.06a<br>(0.10) | NS |
| Deteriorated/rotten aroma | 2.06a<br>(0.06)                          | 2.04a<br>(0.06) | 2.02a<br>(0.06) | 2.06a<br>(0.06) | 2.20a<br>(0.06) | 2.04a<br>(0.06) | NS                                 | 2.16a<br>(0.06) | 1.93a<br>(0.06) | 2.10a<br>(0.06) | 1.98a<br>(0.06) | 2.16a<br>(0.06) | 2.08a<br>(0.06) | NS |
| Muddy/mouldy aroma        | 2.14a<br>(0.05)                          | 2.21a<br>(0.05) | 2.05a<br>(0.05) | 2.22a<br>(0.05) | 2.08a<br>(0.05) | 2.18a<br>(0.05) | NS                                 | 2.25a<br>(0.05) | 2.10a<br>(0.05) | 2.16a<br>(0.05) | 2.10a<br>(0.05) | 2.20a<br>(0.05) | 2.06a<br>(0.05) | NS |
| Fruity aroma              | 3.66a<br>(0.08)                          | 4.01a<br>(0.08) | 3.72a<br>(0.08) | 4.09a<br>(0.08) | 3.75a<br>(0.08) | 3.92a<br>(0.08) | NS                                 | 3.95a<br>(0.08) | 3.71a<br>(0.08) | 3.90a<br>(0.08) | 3.91a<br>(0.08) | 3.94a<br>(0.08) | 3.73a<br>(0.08) | NS |
| Green/grassy aroma        | 2.87a<br>(0.07)                          | 3.36a<br>(0.07) | 2.94a<br>(0.07) | 3.42a<br>(0.07) | 2.91a<br>(0.07) | 3.30a<br>(0.07) | NS                                 | 3.12a<br>(0.07) | 3.11a<br>(0.07) | 3.17a<br>(0.07) | 3.19a<br>(0.07) | 3.10a<br>(0.07) | 3.10a<br>(0.07) | NS |
| Peely/peel oil aroma      | 3.13a<br>(0.08)                          | 3.84a<br>(0.08) | 3.30a<br>(0.08) | 3.80a<br>(0.08) | 3.18a<br>(0.08) | 3.74a<br>(0.08) | NS                                 | 3.54a<br>(0.08) | 3.43a<br>(0.08) | 3.55a<br>(0.08) | 3.55a<br>(0.08) | 3.49a<br>(0.08) | 3.42a<br>(0.08) | NS |
| Soapy aroma               | 3.35a<br>(0.09)                          | 3.46a<br>(0.09) | 3.18a<br>(0.09) | 3.48a<br>(0.09) | 2.96a<br>(0.09) | 3.12a<br>(0.09) | NS                                 | 3.42a<br>(0.09) | 3.39a<br>(0.09) | 3.29a<br>(0.09) | 3.37a<br>(0.09) | 3.14a<br>(0.09) | 2.94a<br>(0.09) | NS |
| Pungent aroma             | 2.92a<br>(0.08)                          | 3.42a<br>(0.08) | 2.78a<br>(0.08) | 3.48a<br>(0.08) | 2.83a<br>(0.08) | 3.39a<br>(0.08) | NS                                 | 3.20a<br>(0.08) | 3.14a<br>(0.08) | 3.13a<br>(0.08) | 3.13a<br>(0.08) | 3.16a<br>(0.08) | 3.06a<br>(0.08) | NS |
| Woody/spicy aroma         | 2.32a<br>(0.06)                          | 2.64a<br>(0.06) | 2.38a<br>(0.06) | 2.59a<br>(0.06) | 2.27a<br>(0.06) | 2.47a<br>(0.06) | NS                                 | 2.53a<br>(0.06) | 2.44a<br>(0.06) | 2.52a<br>(0.06) | 2.45a<br>(0.06) | 2.43a<br>(0.06) | 2.31a<br>(0.06) | NS |
| Sweet aroma               | 3.44a<br>(0.09)                          | 3.93a<br>(0.09) | 3.58a<br>(0.09) | 3.86a<br>(0.09) | 3.64a<br>(0.09) | 3.79a<br>(0.09) | NS                                 | 3.74a<br>(0.09) | 3.63a<br>(0.09) | 3.76a<br>(0.09) | 3.68a<br>(0.09) | 3.88a<br>(0.09) | 3.56a<br>(0.09) | NS |
| Overall flavour intensity | 6.46a<br>(0.08)                          | 6.36a<br>(0.08) | 6.31a<br>(0.08) | 6.28a<br>(0.08) | 6.35a<br>(0.08) | 6.46a<br>(0.08) | NS                                 | 6.51a<br>(0.08) | 6.31a<br>(0.08) | 6.29a<br>(0.08) | 6.30a<br>(0.08) | 6.39a<br>(0.08) | 6.42a<br>(0.08) | NS |
| Sour flavour              | 5.96a<br>(0.11)                          | 5.91a<br>(0.11) | 5.07a<br>(0.11) | 5.08a<br>(0.11) | 4.40a<br>(0.11) | 4.35a<br>(0.11) | NS                                 | 6.01a<br>(0.11) | 5.86a<br>(0.11) | 4.96a<br>(0.11) | 5.19a<br>(0.11) | 4.31a<br>(0.11) | 4.44a<br>(0.11) | NS |
| Sweet flavour             | 2.92a<br>(0.09)                          | 3.16a<br>(0.09) | 4.38a<br>(0.09) | 4.63a<br>(0.09) | 5.85a<br>(0.09) | 5.78a<br>(0.09) | NS                                 | 3.09a<br>(0.09) | 2.99a<br>(0.09) | 4.49a<br>(0.09) | 4.52a<br>(0.09) | 5.85a<br>(0.09) | 5.78a<br>(0.09) | NS |

|                           |                 |                 |                 |                 |                 |                 |    |                               |                               |                               |                               |                               |                               |    |
|---------------------------|-----------------|-----------------|-----------------|-----------------|-----------------|-----------------|----|-------------------------------|-------------------------------|-------------------------------|-------------------------------|-------------------------------|-------------------------------|----|
| <b>Bitter flavour</b>     | 5.51a<br>(0.12) | 4.98a<br>(0.12) | 4.80a<br>(0.12) | 4.07a<br>(0.12) | 4.02a<br>(0.12) | 3.76a<br>(0.12) | NS | 5.30a<br>(0.12)               | 5.18a<br>(0.12)               | 4.55a<br>(0.12)               | 4.32a<br>(0.12)               | 3.82a<br>(0.12)               | 3.96a<br>(0.12)               | NS |
| <b>Astringent flavour</b> | 5.42a<br>(0.10) | 5.28a<br>(0.10) | 4.96a<br>(0.10) | 4.79a<br>(0.10) | 4.52a<br>(0.10) | 4.31a<br>(0.12) | NS | <b>5.62a</b><br><b>(0.10)</b> | <b>5.08b</b><br><b>(0.10)</b> | <b>4.92b</b><br><b>(0.10)</b> | <b>4.83b</b><br><b>(0.10)</b> | <b>4.30c</b><br><b>(0.10)</b> | <b>4.52c</b><br><b>(0.10)</b> | *  |
| <b>Citrus flavour</b>     | 4.29a<br>(0.08) | 4.56a<br>(0.08) | 4.33a<br>(0.08) | 4.56a<br>(0.08) | 4.29a<br>(0.08) | 4.67a<br>(0.08) | NS | <b>4.59a</b><br><b>(0.08)</b> | <b>4.26b</b><br><b>(0.08)</b> | <b>4.40a</b><br><b>(0.08)</b> | <b>4.50a</b><br><b>(0.08)</b> | <b>4.42a</b><br><b>(0.08)</b> | <b>4.54a</b><br><b>(0.08)</b> | *  |
| <b>Grapefruit flavour</b> | 4.45a<br>(0.09) | 4.60a<br>(0.09) | 4.69a<br>(0.09) | 4.38a<br>(0.09) | 4.32a<br>(0.09) | 4.20a<br>(0.09) | NS | 4.60a<br>(0.09)               | 4.45a<br>(0.09)               | 4.60a<br>(0.09)               | 4.48a<br>(0.09)               | 4.39a<br>(0.09)               | 4.14a<br>(0.09)               | NS |
| <b>Bitter aftertaste</b>  | 5.03a<br>(0.12) | 4.77a<br>(0.12) | 4.54a<br>(0.12) | 3.96a<br>(0.12) | 3.91a<br>(0.12) | 3.52a<br>(0.12) | NS | 4.94a<br>(0.12)               | 4.87a<br>(0.12)               | 4.36a<br>(0.12)               | 4.13a<br>(0.12)               | 3.65a<br>(0.12)               | 3.77a<br>(0.12)               | NS |

<sup>1</sup> Mean values in a row for a specific two-way interaction effect printed in bold and with different letters are significantly different; \*  $p \leq 0.05$ , \*\*  $p \leq 0.01$ , \*\*\*  $p \leq 0.0001$ ; NS = not significantly different Attribute intensity scale (0-10 cm) ranging from 'not intense' (0) to 'very intense' (10); <sup>2</sup> Aroma blend [Caryophyllene, citral, nootkatone, aldehyde C8 (octanal), aldehyde C9 (nonanal), aldehyde C10 (decanal)] <sup>3</sup> Red color = 0.001 % solution (30 % Sunset yellow and 70 % Ponceau red); Yellow color = 0.0125% Quinoline yellow.
